# Supplementary material for: New insights into tuberous sclerosis complex: from structure to pathogenesis
Source: Frontiers journal article supplement (doi:10.3389/fcell.2025.1595867), 2025-06-27
Supplement: Data_Sheet_1.pdf [file Data_Sheet_1.pdf]

Supplementary Table 1. TSC2 phosphorylation sites and corresponding kinases

| Kinase        | TSC2 phosphorylation sites      | mTORC1 activities |
|---------------|---------------------------------|-------------------|
| AKT           | S939, S981, S1130, S1132, T1464 | +                 |
| AMPK          | T1271, S1383, S1387             | -                 |
| DAPK1         | S939                            | +                 |
| DYRK1A        | T1464                           | +                 |
| ERK1/2        | S540, S664                      | +                 |
| GSK-3 $\beta$ | S1337, S1341                    | -                 |
| PKC- $\delta$ | S932, S939                      | +                 |
| PKG1          | S1364, S1365                    | +                 |
| RSK1          | S1364, S1798                    | +                 |

+ upregulated; - downregulated

Supplementary Table 2. Classification of pathogenic TSC1 and TSC2 variants

| Classification of variants  | TSC1 | TSC2 |
|-----------------------------|------|------|
| Frameshift                  | 543  | 1054 |
| Premature termination codon | 195  | 349  |
| Splicing/ unknown issues    | 129  | 970  |
| Missense                    | 50   | 571  |
| Total                       | 917  | 2944 |

All the TSC1 and TSC2 variants are from TSC Leiden Open Variant Databases ([https://databases.lovd.nl/shared/genes?search\\_name=tuberous%20sclerosis](https://databases.lovd.nl/shared/genes?search_name=tuberous%20sclerosis)). These unique DNA variants are clinically classified as either pathogenic or likely pathogenic.

Supplementary Table 3. Structural classification of TSC2 variants.

| TSC2 Variant | Predicted structural effect                   | Functional assay |
|--------------|-----------------------------------------------|------------------|
| P91L         | Disrupts hydrophobic packing                  | Active (1)       |
| R98W         | Disrupts polar interactions                   | N.D.             |
| L105P        | Breaks helix                                  | N.D.             |
| L180P        | Breaks helix                                  | N.D.             |
| L219P        | Breaks helix                                  | N.D.             |
| C244R        | Affects packing                               | Inactive (2)     |
| M286V        | None                                          | N.D.             |
| G300V        | Breaks helix                                  | N.D.             |
| W304R        | Disrupts hydrophobic packing                  | N.D.             |
| E337K        | Disrupts polar interactions                   | N.D.             |
| L340P        | Breaks helix                                  | Inactive (2)     |
| K347R        | None                                          | N.D.             |
| A357V        | Affects packing; close to TSC1/TSC2 interface | Inactive (2)     |
| R367Q        | None                                          | Active (2 & 3)   |
| Y407D        | Disrupts polar interactions                   | N.D.             |
| L410R        | Disrupts hydrophobic packing                  | Inactive (1)     |
| P419S        | Breaks turn                                   | Inactive (2)     |
| A431V        | Affects packing                               | N.D.             |
| L448P        | Breaks helix                                  | Inactive (1)     |
| A460T        | None                                          | Active (2)       |
| R462H        | Breaks turn                                   | Active (2)       |
| L493V        | Affects packing                               | Inactive (1)     |
| L493P        | Breaks turn                                   | Inactive (1)     |
| V504D        | Affects packing                               | N.D.             |
| N525S        | None                                          | Active (2 & 3)   |
| K533N        | None                                          | N.D.             |
| R585H        | Breaks helix                                  | N.D.             |
| H597R        | Disrupts polar interactions                   | N.D.             |
| H597Y        | Affects packing                               | Inactive (1)     |
| Y598H        | Disrupts polar interactions                   | Inactive (2)     |
| Y598C        | Disrupts polar interactions                   | N.D.             |
| A607T        | Breaks turn                                   | Active (2)       |
| R611Q        | Disrupts polar interactions                   | Inactive (3)     |
| R611W        | Disrupts polar interactions                   | Inactive (3)     |
| R611G        | Disrupts polar interactions                   | Inactive (3)     |
| F615S        | Disrupts hydrophobic packing                  | Weak (3)         |
| L618P        | Breaks helix                                  | N.D.             |
| R622W        | Breaks strand                                 | Inactive (2)     |
| R622P        | Breaks strand                                 | N.D.             |
| D647N        | None                                          | N.D.             |
| M649T        | None                                          | N.D.             |
| M649L        | None                                          | N.D.             |
| A678T        | None                                          | N.D.             |

|        |                                                                                        |                  |
|--------|----------------------------------------------------------------------------------------|------------------|
| L693P  | Breaks helix                                                                           | Active (2)       |
| C696Y  | Disrupts hydrophobic packing                                                           | Inactive (2 & 3) |
| C696R  | Disrupts hydrophobic packing                                                           | Inactive (3)     |
| E700K  | Disrupts polar interactions                                                            | N.D.             |
| V705M  | Affects packing                                                                        | Inactive (1)     |
| L737P  | Breaks helix                                                                           | N.D.             |
| L792R  | Disrupts hydrophobic packing                                                           | N.D.             |
| C804R  | Disrupts hydrophobic packing                                                           | Inactive (2)     |
| L808S  | Disrupts hydrophobic packing                                                           | N.D.             |
| L826M  | Disrupts hydrophobic packing                                                           | Active (2)       |
| L826P  | Breaks helix                                                                           | Active (3)       |
| L830P  | Breaks helix                                                                           | N.D.             |
| L847P  | Breaks helix                                                                           | N.D.             |
| P878S  | Breaks turn                                                                            | N.D.             |
| F897S  | Disrupts hydrophobic packing                                                           | Inactive (2)     |
| R905W  | Breaks helix; close to TSC2<br>dimerisation interface                                  | N.D.             |
| R905Q  | Breaks helix; close to TSC2<br>dimerisation interface                                  | Inactive (2 & 3) |
| L916P  | Disrupts hydrophobic packing                                                           | N.D.             |
| L916R  | Breaks helix                                                                           | Inactive (2)     |
| L1027P | Breaks helix; close to TSC2<br>dimerisation interface                                  | N.D.             |
| D1028N | Disrupts polar interactions;<br>close to TSC2 dimerisation<br>interface                | Inactive (2)     |
| M1030R | Disrupts hydrophobic packing;<br>close to TSC2 dimerisation<br>interface               | N.D.             |
| R1032P | Breaks helix; close to TSC2<br>dimerisation interface                                  | Inactive (2)     |
| L1061P | Breaks strand; close to TSC2<br>dimerisation interface and GAP<br>domain               | Inactive (2)     |
| T1068I | Break strand; close to TSC2<br>dimerisation interface and GAP<br>domain                | Inactive (2)     |
| Y1186C | Disrupts hydrophobic packing                                                           | N.D.             |
| R1200W | Disrupts polar interactions;<br>close to TSC2 dimerisation<br>interface and GAP domain | Inactive (4)     |
| R1200P | Breaks strand; close to TSC2<br>dimerisation interface and GAP<br>domain               | N.D.             |
| T1203P | Disrupts polar interactions;<br>close to TSC2 dimerisation<br>interface and GAP domain | N.D.             |

|        |                                                                                                   |              |
|--------|---------------------------------------------------------------------------------------------------|--------------|
| G1204E | Affects packing; close to TSC2 dimerisation interface and GAP domain                              | Inactive (2) |
| P1497R | Breaks helix; close to TSC2 dimerisation interface and GAP domain                                 | N.D.         |
| P1497L | Breaks helix; close to TSC2 dimerisation interface and GAP domain                                 | N.D.         |
| P1497S | Breaks helix; close to TSC2 dimerisation interface and GAP domain                                 | N.D.         |
| P1497T | Breaks helix; close to TSC2 dimerisation interface and GAP domain                                 | N.D.         |
| S1498N | Disrupts hydrophobic packing; close to TSC2 dimerisation interface and GAP domain                 | N.D.         |
| S1498T | Disrupts hydrophobic packing; close to TSC2 dimerisation interface and GAP domain                 | N.D.         |
| Q1503P | Breaks helix and disrupts polar interactions; close to TSC2 dimerisation interface and GAP domain | Inactive (1) |
| D1535A | Disrupts polar interactions; close to TSC2 dimerisation interface and GAP domain                  | N.D.         |
| L1548P | Break strand; close to TSC2 GAP domain                                                            | Inactive (3) |
| Y1549C | Disrupts polar interactions; close to TSC1 interface                                              | Inactive (5) |
| Q1554H | Disrupts polar interactions; close to TSC1 interface                                              | Inactive (2) |
| E1558K | Disrupts polar interactions                                                                       | Inactive (5) |
| L1562P | Break helix                                                                                       | Inactive (5) |
| G1567D | Disrupts hydrophobic packing; close to TSC1 interface                                             | Inactive (1) |
| Y1571N | Disrupts hydrophobic packing; close to TSC1 interface                                             | Inactive (1) |
| L1578P | Breaks helix; close to TSC1 interface and TSC dimerization interface                              | Inactive (1) |
| H1620W | Disrupts polar interactions                                                                       | N.D.         |
| H1620R | Affects packing                                                                                   | Inactive (1) |
| T1623I | Disrupts hydrophobic packing; close to TSC1 interface                                             | Inactive (1) |

|        |                                                              |              |
|--------|--------------------------------------------------------------|--------------|
| H1640Y | Disrupts polar interactions;<br>putative Rheb-TSC2 interface | Inactive (5) |
| G1642D | Affects packing; putative<br>Rheb-TSC2 interface             | Inactive (2) |
| N1643H | Loss of active site residue;<br>putative Rheb-TSC2 interface | Inactive (2) |
| N1643S | Loss of active site residue;<br>putative Rheb-TSC2 interface | Inactive (2) |
| V1646M | Disrupts hydrophobic packing                                 | Inactive (2) |
| V1646G | Disrupts hydrophobic packing                                 | Inactive (2) |
| I1648T | Disrupts hydrophobic packing                                 | Inactive (5) |
| Y1650C | Disrupts hydrophobic packing;<br>close to TSC1 interface     | N.D.         |
| N1651S | Disrupts polar interactions;<br>close to TSC1 interface      | N.D.         |
| P1673L | Disrupts hydrophobic packing                                 | N.D.         |
| P1675L | Breaks turn; close to TSC1<br>interface                      | Inactive (1) |
| P1675R | Breaks turn; close to TSC1<br>interface                      | N.D.         |
| N1681K | Disrupts polar interactions                                  | Inactive (5) |
| L1682P | Breaks strand                                                | N.D.         |
| S1684P | Affects packing                                              | N.D.         |
| P1709L | Breaks helix                                                 | Inactive (1) |
| V1711M | Affects packing                                              | Inactive (1) |
| R1713H | Disrupts hydrophobic packing                                 | Inactive (2) |
| R1713P | Breaks helix                                                 | Inactive (2) |
| L1717P | Breaks helix                                                 | N.D.         |
| R1743Q | Disrupts polar interactions;<br>TSC2 GAP domain              | N.D.         |
| R1743W | Disrupts polar interactions;<br>TSC2 GAP domain              | N.D.         |
| R1743P | Disrupts polar interactions;<br>TSC2 GAP domain              | N.D.         |
| R1743L | Disrupts polar interactions;<br>TSC2 GAP domain              | N.D.         |
| E1756  | Disrupts polar interactions                                  | N.D.         |

TSC2 variants were reported at least 5 on TSC2 Leiden Open Variant Databases (LOVD; <http://www.lovd.nl/TSC2>). Predicted structure effects are based on the mutagenesis stimulation using the published TSC complex model (PDB 9ce3).

1. Hoozeveen-Westerveld M, Wentink M, van den Heuvel D, Mozaffari M, Ekong R, et al. Functional assessment of variants in the TSC1 and TSC2 genes identified in individuals with tuberous sclerosis complex. Hum Mutat. (2011) 32(4):424-435.
2. Hoozeveen-Westerveld M, Ekong R, Povey S, Mayer K, Lannoy N, et al. Functional assessment of TSC2 variants identified in individuals with tuberous sclerosis complex. Hum Mutat. (2013) 34(1):167-175.
3. Sancak O, Nellist M, Goedbloed M, Elfferich P, Wouters C, et al. Mutational analysis of the TSC1 and TSC2 genes in a diagnostic setting: genotype – phenotype correlations and comparison of diagnostic DNA techniques in Tuberous Sclerosis Complex. Eur J Hum Genet (2005) 13:731–741.
4. Wentink M, Nellist M, Hoozeveen-Westerveld M, Zonnenberg B, van der Kolk D, et al. Functional characterization of the TSC2 c.3598C>T (p.R1200W) missense mutation that co-segregates with tuberous sclerosis complex in mildly affected kindreds. Clin Genet. 2012 May;81(5):453–461.
5. Hansmann P, Brückner A, Kiontke S, Berkenfeld B, Seebohm G, et al. Structure of the TSC2 GAP Domain: mechanistic insight into catalysis and pathogenic mutations. Structure. (2020) 28(8):933-942.e4.

Supplementary Table 4. Structural classification of TSC1 variants.

| TSC1 variant | Predicted structural effect                                        | Functional assay |
|--------------|--------------------------------------------------------------------|------------------|
| K30R         | None                                                               | N.D.             |
| L50P         | Breaks helix                                                       | Inactive (1 & 2) |
| E51D         | None                                                               | Active (1 & 2)   |
| L61P         | Breaks helix                                                       | Inactive (1 & 2) |
| L64W         | Disrupts hydrophobic packing                                       | N.D.             |
| A84T         | None                                                               | N.D.             |
| L116V        | None                                                               | N.D.             |
| K121R        | Disrupts polar interactions                                        | N.D.             |
| V178I        | None                                                               | N.D.             |
| F188V        | Disrupts hydrophobic packing                                       | N.D.             |
| R190C        | Disrupts polar interactions                                        | Inactive (1 & 2) |
| L191R        | Disrupts hydrophobic packing                                       | N.D.             |
| P196L        | Disrupts hydrophobic packing                                       | N.D.             |
| F216S        | Disrupts hydrophobic packing; close to TSC1 dimerisation interface | N.D.             |
| M224R        | Disrupts hydrophobic packing; close to TSC1 dimerisation interface | N.D.             |
| R246K        | Disrupts polar interactions; close to TSC1 dimerisation interface  | N.D.             |
| Q654E        | Disrupts polar interactions                                        | N.D.             |
| H732Y        | Affects packing; close to TSC2 interface                           | N.D.             |
| N762S        | None                                                               | Active (3)       |
| T899S        | None                                                               | N.D.             |

TSC1 variants were reported at least 5 on TSC1 Leiden Open Variant Databases (LOVD; [http:// www.lovd.nl/TSC1](http://www.lovd.nl/TSC1)). Predicted structure effects are based on the mutagenesis stimulation using the published TSC complex model (PDB 9ce3).

1. Mozaffari M, Hoogveen-Westerveld M, Kwiatkowski D, Sampson J, Ekong R, et al. Identification of a region required for TSC1 stability by functional analysis of TSC1 missense mutations found in individuals with tuberous sclerosis complex. *BMC Med Genet.* (2009) 10:88.
2. Hoogveen-Westerveld M, Wentink M, van den Heuvel D, Mozaffari M, Ekong R, et al. Functional assessment of variants in the TSC1 and TSC2 genes identified in individuals with tuberous sclerosis complex. *Hum Mutat.* (2011) 32(4):424-435.
3. Hoogveen-Westerveld M, Ekong R, Povey S, Karbassi I, Batish SD, et al. Functional assessment of TSC1 missense variants identified in individuals with tuberous sclerosis complex. *Hum Mutat.* 2012 Mar;33(3):476-479.
